# Supplementary material
Source: HighWire-hosted journal article supplement (https://www.annfammed.org/highwire/filestream/7783/field_highwire_adjunct_files/0/Cardol_Suppl_Table.pdf)
Supplement: Cardol_Suppl_Table.pdf [file Cardol_Suppl_Table.pdf]

Online Supplementary Material

Cardol M, van den Bosch WJHM, Spreeuwenberg P, Groenewegen PP, van Dijk L, de Bakker DH. All in the family: headaches and abdominal pain as indicators for consultation patterns in families. *Ann Fam Med*. 2006;4:506-511.

<http://www.annfammed.org/cgi/content/full/4/6/506/DC1>

**Supplemental Table. Estimates and Multilevel Poisson Model (Allowing Extra Dispersion at the Individual Level) With 3 Levels, Underlying Table 2, Based on the Corrected (for All Other Parameters in the Model) Variance and Covariance Estimates**

| Level                                                                                                                                                                                         | Headache<br>Estimate (SE) | Abdominal<br>Pain<br>Estimate (SE) | Minor<br>Ailments<br>Estimate (SE) | Musculoskeletal<br>Trauma<br>Estimate (SE) | Chronic Illness<br>Estimate (SE) |
|-----------------------------------------------------------------------------------------------------------------------------------------------------------------------------------------------|---------------------------|------------------------------------|------------------------------------|--------------------------------------------|----------------------------------|
| <b>Practice level</b>                                                                                                                                                                         | 0.171 (0.039)             | 0.161 (0.034)                      | 0.077 (0.012)                      | 0.180 (0.032)                              | 0.056 (0.009)                    |
| % of contextual<br>variance*                                                                                                                                                                  | 1.4                       | 1.6                                | 10.1                               | 3.7                                        | 4.1                              |
| <b>Family level</b>                                                                                                                                                                           |                           |                                    |                                    |                                            |                                  |
| Headache                                                                                                                                                                                      | 7.447 (0.161)             | 2.489 (0.113)                      | 0.216 (0.034)                      | 0.863 (0.080)                              | 0.670 (0.040)                    |
| Abdominal pain                                                                                                                                                                                |                           | 5.806 (0.121)                      | 0.294 (0.029)                      | 0.766 (0.068)                              | 0.288 (0.035)                    |
| Minor ailments                                                                                                                                                                                |                           |                                    | 0.080 (0.012)                      | 0.067 (0.020)                              | 0.028 (0.010)                    |
| Musculoskeletal<br>trauma                                                                                                                                                                     |                           |                                    |                                    | 3.016 (0.058)                              | 0.036 (0.024)                    |
| Chronic illness                                                                                                                                                                               |                           |                                    |                                    |                                            | 0.272 (0.018)                    |
| <b>Individual level</b>                                                                                                                                                                       | 0.170 (<0.001)            | 0.186 (<0.001)                     | 0.966 (0.001)                      | 0.308 (0.002)                              | 0.866 (0.004)                    |
| * Percentage of variance ascribed to the practice level of the total variance ascribed to the context (practice + family). Practice-level variance accounted for 2.2% of contextual variance. |                           |                                    |                                    |                                            |                                  |
| <b>Fixed effects<br/>controlled for</b>                                                                                                                                                       | <b>Father</b>             | <b>Mother</b>                      | <b>Daughter</b>                    | <b>Son</b>                                 |                                  |
|                                                                                                                                                                                               | Father * age              | Mother * age                       | Daughter * age                     | Son * age                                  |                                  |
|                                                                                                                                                                                               | Father * age <sup>2</sup> | Mother * age <sup>2</sup>          | Daughter * age <sup>2</sup>        | Son * age <sup>2</sup>                     |                                  |
|                                                                                                                                                                                               | Father * age <sup>3</sup> | Mother * age <sup>3</sup>          | Daughter * age <sup>3</sup>        | Son * age <sup>3</sup>                     |                                  |
